# Supplementary material for: Sensitive and Rapid Detection of Aspartic Acid with Co3O4-ZnO Nanorods Using Differential Pulse Voltammetry
Source: MDPI journal article supplement (doi:10.3390/bios13010088), 2023-01-05
Supplement: s1 [file s1]

# Sensitive and Rapid Detection of Aspartic Acid with Co<sub>3</sub>O<sub>4</sub>-ZnO Nanorods Using Differential Pulse Voltammetry

Sulaiman Y. Alfaifi <sup>1</sup>, Waheed Abiodun Adeosun <sup>1,2</sup>, Abdullah M. Asiri <sup>1,2</sup> and Mohammed M. Rahman <sup>1,2,\*</sup>

<sup>1</sup> Chemistry Department, Faculty of Science, King Abdulaziz University, P.O. Box 80203, Jeddah 21589, Saudi Arabia

<sup>2</sup> Center of Excellence for Advanced Materials Research (CEAMR), King Abdulaziz University, P.O. Box 80203, Jeddah 21589, Saudi Arabia

\* Correspondence: mmrahman@kau.edu.sa

## Electronic Supplemental Section

### S1 (a)

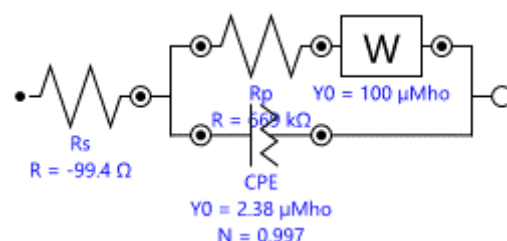

| Element | Parameter | Value                   |
|---------|-----------|-------------------------|
| Rs      | R         | -99.356                 |
| Rct     | R         | $6.6851 \times 10^5$    |
| CPE     | Y0        | $2.3807 \times 10^{-6}$ |
|         | N         | 0.99701                 |
| W1      | Y0        | 0.0001                  |

### (b)

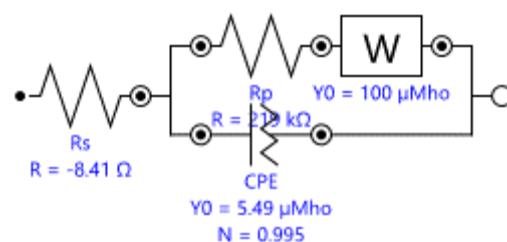

| Element | Parameter | Value                   |
|---------|-----------|-------------------------|
| Rs      | R         | -8.4112                 |
| Rp      | R         | $2.1882 \times 10^5$    |
| CPE     | Y0        | $5.4865 \times 10^{-6}$ |
|         | N         | 0.99533                 |
| W1      | Y0        | 0.0001                  |

---

## S2: Analytical Performance Parameters

### *Limit of Detection (LOD)*

This was calculated using the equation;

$$\text{LOD} = \frac{3 \times \text{SD}}{\text{Slope of the calibration plot}}$$

where SD is the standard deviation of the blank response.

From our results,  $\text{LOD} = 3 \times 1.05 \times 10^{-6} / (0.0001) = 0.032 \mu\text{M}$

### *Limit of Quantification (LOQ)*

This was determined using the equation.

$$\text{LOQ} = \frac{10 \times \text{SD}}{\text{Slope of the calibration plot}}$$

$\text{LOQ} = 10 \times 1.05 \times 10^{-6} / (0.0001) = 0.11 \mu\text{M}$

### *Sensitivity*

This was calculated using the formula:

$$\text{Sensitivity} = \frac{\text{Slope of the calibration plot}}{\text{GCE surface area}}$$

$\text{Sensitivity} = 0.0001 \mu\text{A}\mu\text{M}^{-1} / 0.07 \text{ cm}^2 = 0.0014 \mu\text{A}\mu\text{M}^{-1}\text{cm}^{-2}$

## S3: Real Sample Analysis

Method used: Standard addition.

$$\text{Recovery (\%)} = \frac{C_i - C_o}{C_s}$$

Where  $C_i$  is the total concentration of analyte,  $C_o$  is concentration of analyte (before spike),  $C_s$  is the concentration of the spiked 2, 4-dnphz.
